# Supplementary material for: 2D layered metal-halide perovskite/oxide semiconductor-based broadband optoelectronic synaptic transistors with long-term visual memory
Source: Royal Society of Chemistry journal article supplement (doi:10.1039/d0tc04250a), 2021-01-01
Supplement: d0tc04250a1.pdf [file d0tc04250a1.pdf]

## **Supplementary Information**

### **2D layered metal-halide perovskite/oxide semiconductor-based broadband optoelectronic synaptic transistors with long-term visual memory**

*Youngjun Park, Min-Kyu Kim, and Jang-Sik Lee\**

Department of Materials Science and Engineering, Pohang University of Science and  
Technology (POSTECH), Pohang 37673, Korea.

\*Corresponding Author. E-mail: [jangsik@postech.ac.kr](mailto:jangsik@postech.ac.kr)

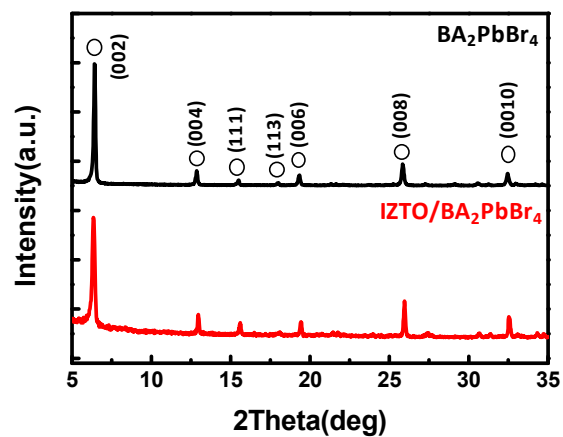

**Fig. S1** XRD patterns of the  $\text{BA}_2\text{PbBr}_4$  films (a) before and (b) after deposition of IZTO.

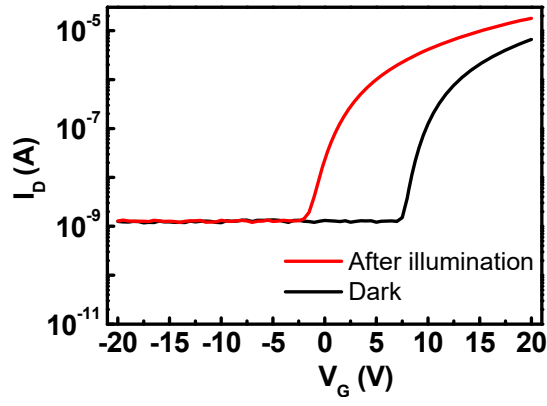

**Fig. S2** Transfer characteristics under ‘dark’ and ‘after illumination’ (365 nm, 100  $\mu\text{W}/\text{cm}^2$ , 30 s) of the device composed of IZTO. Transfer characteristic of ‘after illumination’ state is measured 30 s after application of optical pulse (365 nm, 100  $\mu\text{W}/\text{cm}^2$ , 30 s) under  $V_G$  sweep from -20 to 20 V.

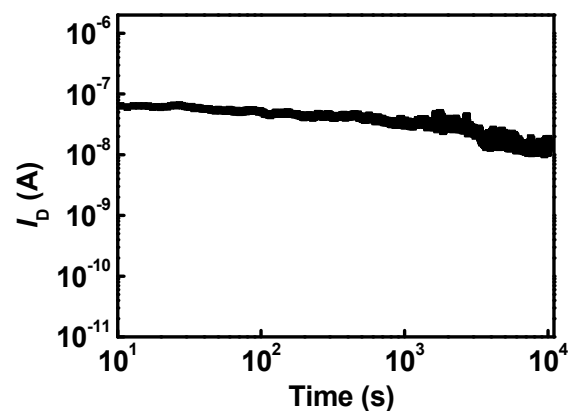

**Fig. S3** Retention properties of IZTO/2D layered OIHP for  $10^4$  s after illumination for 30 s.

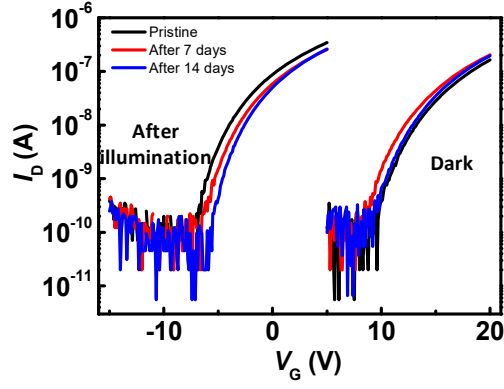

**Fig. S4** Transfer characteristics of the device in ‘dark’ and ‘after illumination’ operation after 14 d in ambient air. Transfer characteristics of ‘dark’ state are measured under  $V_G$  sweep from 5 to 20 V, whereas transfer characteristics of ‘after illumination’ state are measured 30 s after application of optical pulse (365 nm,  $100 \mu\text{W}/\text{cm}^2$ , 30 s) under  $V_G$  sweep from -15 to 5 V.

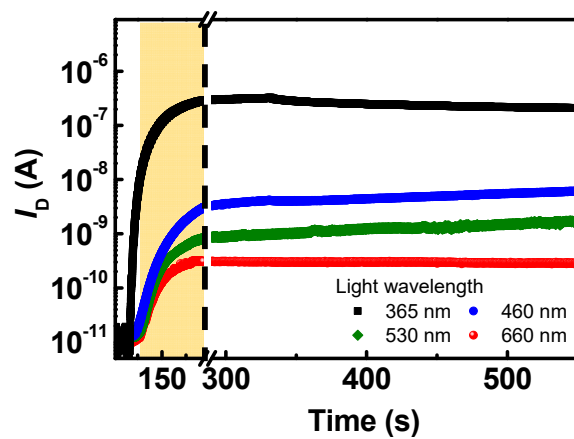

**Fig. S5** Retention characteristics after long-term potentiation by application of optical spikes ( $100 \mu\text{W}/\text{cm}^2$ , 200 s) at wavelengths of 365, 460, 530, and 660 nm.

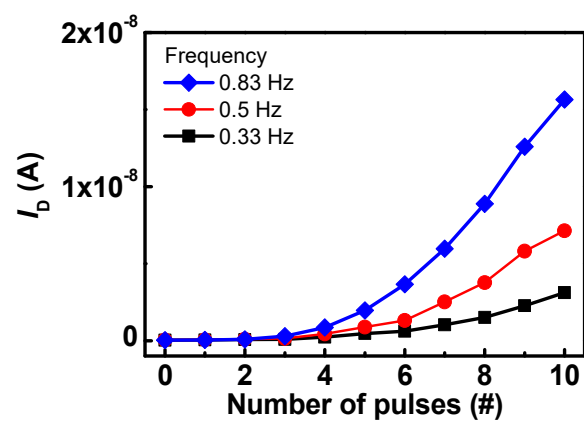

**Fig. S6** Change of  $I_D$  by applying the 10 consecutive optical spikes (365 nm,  $100 \mu\text{W}/\text{cm}^2$ , 1 s) with different frequencies (0.83 Hz, 0.5 Hz, 0.33 Hz).

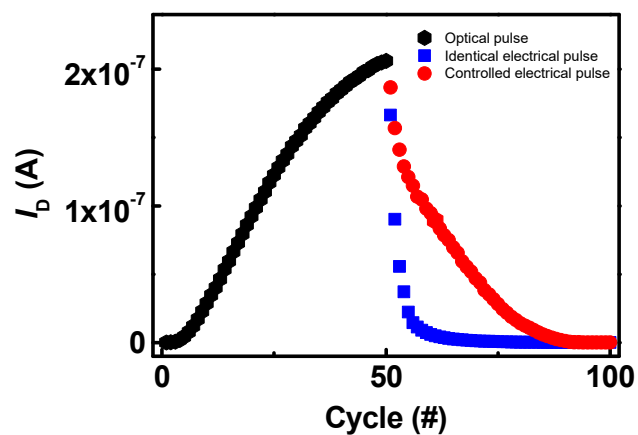

**Fig. S7** Potentiation and depression characteristics by adjusting the applied electrical pulses. Fifty consecutive pulses (20 V, 2 s) were applied for identical pulse condition, whereas fifty consecutive pulses with incremental amplitudes of  $V_G$  pulses from 10 V to 29.6 V (increment: 0.4 V) for controlled pulse condition.

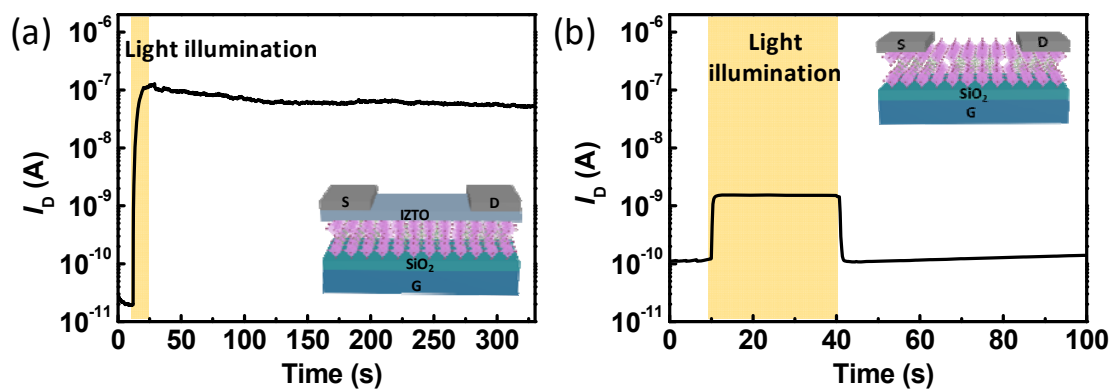

**Fig. S8** (a) Change of current level of (a) IZTO/2D layered OIHP-based device and (b) 2D layered OIHP-based device under illumination (365 nm,  $100 \mu\text{W}/\text{cm}^2$ , 30 s).

### **Artificial neural networks simulation**

Artificial neural network simulations using MNIST datasets were performed in the Linux system with GCC, GNU, and CNU C libraries by using C++ codes.<sup>1</sup> The simulated multi-layer perceptron neural network was composed of 400 input neurons, 100 hidden neurons, and 10 output neurons. The 400 input neurons corresponded to the  $20 \times 20$  MNIST image, and the 10 output neurons corresponded to 10 classes of digits.

1. P. Chen, X. Peng and S. Yu 2017 IEEE International Electron Devices Meeting (IEDM), 2-6 Dec. 2017; pp 6.1.1-6.1.4.
